# Supplementary material
Source: PubMed Central journal article supplement (PMC4751789)

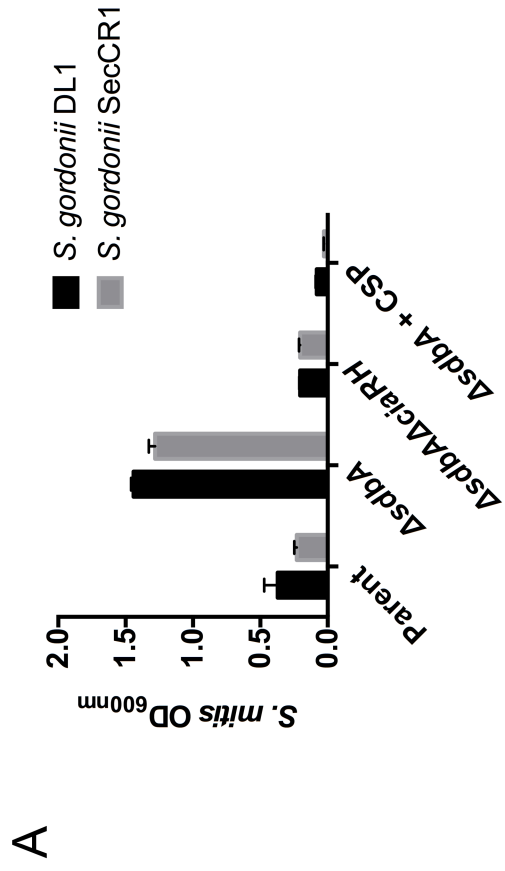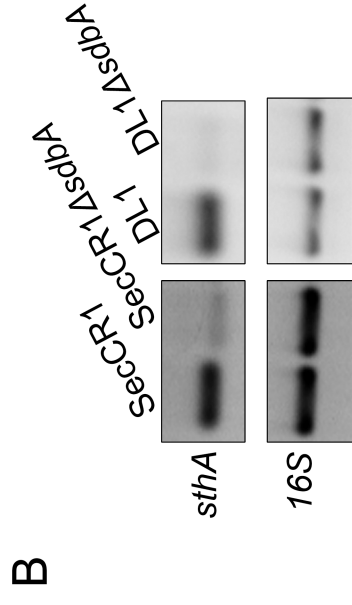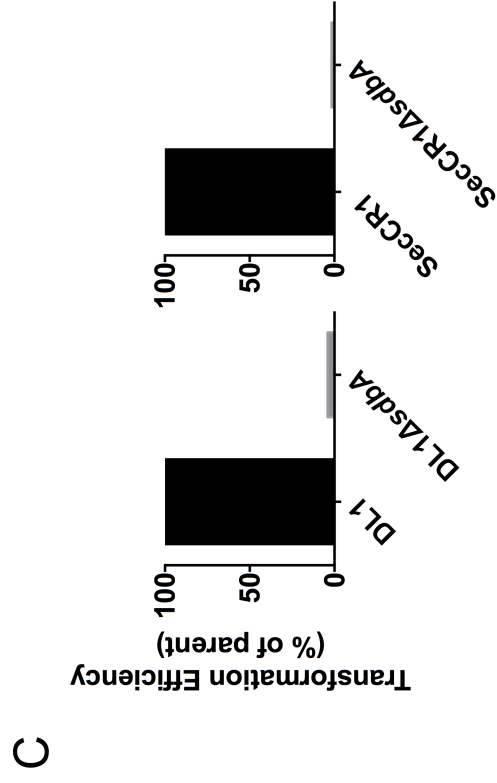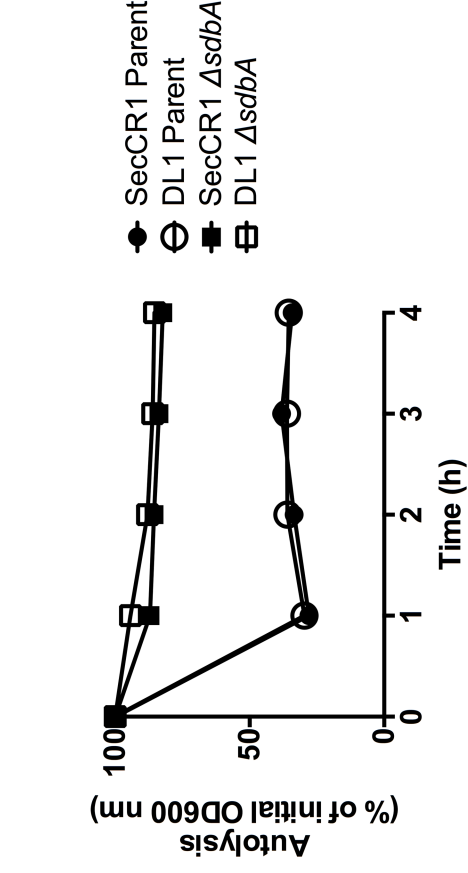

Fig. S1

Supplement: JB.00800-15_zjb999093879so1.pdf [file JB.00800-15_zjb999093879so1.pdf]

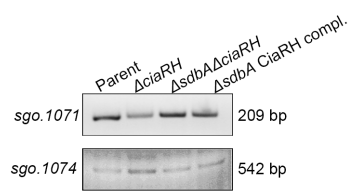

Fig. S2

Supplement: JB.00800-15_zjb999093879so2.pdf [file JB.00800-15_zjb999093879so2.pdf]

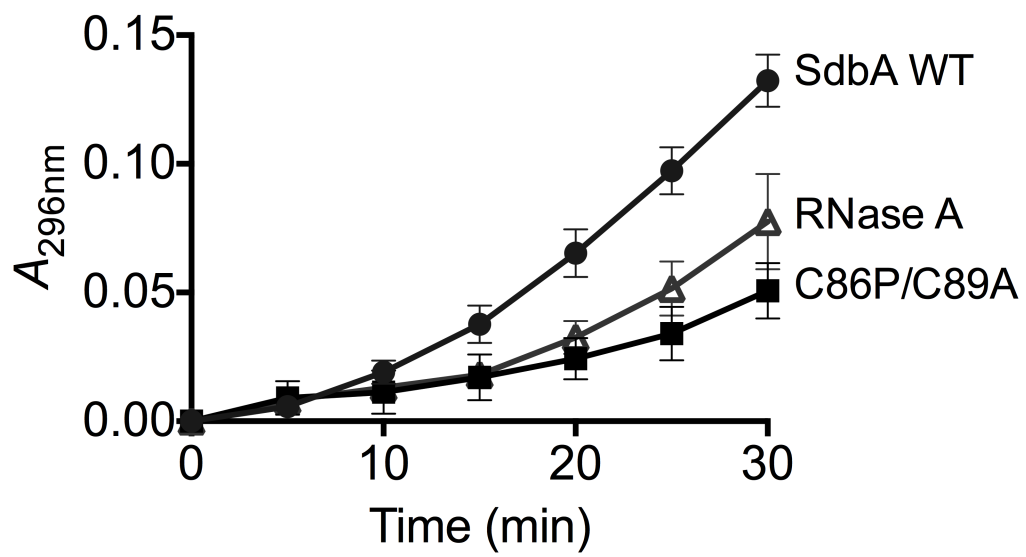

Fig. S3

Supplement: JB.00800-15_zjb999093879so3.pdf [file JB.00800-15_zjb999093879so3.pdf]
